# Supplementary material for: Combination of serum CST1 and HE4 for early diagnosis of endometrial cancer
Source: PeerJ. 2023 Dec 5;11:e16424. doi: 10.7717/peerj.16424 (PMC10704982; doi:10.7717/peerj.16424)
Supplement: Supplemental Information 4 [file peerj-11-16424-s004.xlsx]

## Sheet: Data for early-stage endometria
Number	Hospital number	Age	CA125(IU/ml)	HE4(pmol/l)	CST1(μg/L)	Weight(kg)	Menopausal	Menopausal age	Gestation	Number of births	Diabetes	hypertention	WBC	NE(%)	lym(%)	NE Count	MONO Count	EON Count	BASO Count	MCV	MCH	MCHC	MPV	PCT	PDW	RBC	Hb	PLT	Glucose	Triglyceride	Triglyceride	HDL	LDH	NA	Ca	CA125	CA153	CA199	SCC	AFP	CEA	Clinical diagnosis	FIGO installments	Pathological diagnosis	pathological grade	muscle layer infiltration
1	678785	59	16.8	48.42	405.2	66.6	1	49	2	2	0	0	7.04	35.7	43.1	5.47	0.76	0.02	0.03	82.3	27.4	333	6.4	0.19	16.4	4.25	126	354	5.14	0.51	3.49	0.61	267.3	139	2.1	17.3	4.7	3.32	0.6	1.58	0.65	Endometrioid adenocarcinoma	IAG2	Endometrioid adenocarcinoma	II	浅1/2肌层
2	678496	56	22.6	42.47	292.55	87	0	0	3	2	1	0	7.05	57.7	34.5	3.56	0.44	0.07	0.04	85.9	29.5	344	6.6	0.19	16.7	4.52	133	290	5.61	1.87	6.02	1.4	177.6	143	2.12	21.8	5.8	<2	1.1	3.22	2.73	Endometrioid adenocarcinoma	IAG1	Endometrioid adenocarcinoma	I	深1/2肌层
3	676213	59	143.3	82.5	329.85	70	1	0	2	2	0	0	5.84	62.3	28	4.65	0.36	0.14	0.07	85.9	28.7	334	5.8	0.28	15.9	4.1	118	479	5.13	1.2	4.82	1.28	183.2	142	2.1	24.1	22.2	16.65	0.5	2.43	2.57	Plasma papillary adenocarcinoma of the endometriumPlasma papillary adenocarcinoma of the endometrium	IIG3	Plasma papillary adenocarcinoma of the endometrium	II	深1/2肌层
4	679330	44	18.1	39.91	261.95	50	0	0	4	4	0	1	5.76	58.5	30.3	7.54	0.42	0.18	0.05	87.6	29.5	337	7	0.17	16.6	4.14	122	246	5.02	0.87	4.88	1.62	154.3	142	2.12	67.1	8.3	128.33	0.5	3.81	1.53	Endometrioid adenocarcinoma	IB	Endometrioid adenocarcinoma	II	深1/2肌层
5	679217	62	39.3	42.53	419.75	57.5	0	0	2	2	0	0	9.84	67.3	23.7	4.98	0.75	0.09	0.05	88.7	29.5	333	6.5	0.18	16.5	4.37	129	274	4.35	3.3	4.8	1.66	136.8	138	2.12	11.3	4.9	20.84	0.4	4	1.03	Endometrioid adenocarcinoma	IBG1	Endometrioid adenocarcinoma	I	浅1/2肌层
6	679047	57	17.3	38.63	447.4	67	0	0	4	2	1	0	5.63	60.7	32.8	3.42	0.3	0.05	0.01	89.7	30.3	337	8.2	0.19	19.3	4.64	140	227	5.78	0.91	5.13	1.43	109	138.4	2.37	11.7	10.1	7.03	0.4	2.42	1.17	Endometrioid adenocarcinoma	IAG2	Endometrioid adenocarcinoma	II	浅1/2肌层
7	679046	61	9.8	43.02	417.65	58	1	49	5	3	1	1	5.27	51.3	40	5.37	0.34	0.05	0.07	88.5	29.5	333	9.2	0.06	19.5	4.3	127	64	5.87	2.08	6.8	2.03	189.2	142	2.26	20.5	8.6	14.26	0.9	3.32	2.56	Endometrioid adenocarcinoma	IA	Endometrioid adenocarcinoma	I	浅1/2肌层
8	679752	57	30.2	41.94	370.4	57	1	54	1	1	0	1	7.63	69.9	26.2	6.73	0.26	0.04	0.01	89.9	30.8	342	6.5	0.21	16.6	4.48	138	314	5.19	2.06	4.63	1.51	186.9	142	2.35	11.2	20.5	7.4	0.6	2.96	2.75	Endometrioid adenocarcinoma	IAG1	Endometrial clear cell adenocarcinoma	II	浅1/2肌层
9	679004	66	8.7	109.8	718.4	73	1	0	1	1	0	1	4.55	65.6	23.2	6.83	0.32	0.11	0.08	62.3	18.1	293	7.4	0.3	18.8	4.14	81	413	5.36	0.57	3.87	1.29	172	140.8	2.3	11.2	8.1	22.04	0.5	2.87	1.23	Endometrioid adenocarcinoma	IAG2	Endometrioid adenocarcinoma	II	浅1/2肌层
10	679148	67	29.4	76.23	406.45	59	1	0	2	1	0	0	5.09	49.2	44.8	2.51	0.2	0.1	0.01	60.5	17.6	291	9.5	0.21	18.6	4.1	72	216	5.93	0.4	3.74	2	113	136.7	2.17	35.4	20.8	44.57	0.8	3.74	1.5	Endometrioid adenocarcinoma	IA	Endometrioid adenocarcinoma	II	浅1/2肌层
11	679236	57	19.3	41.49	441.65	60	1	53	1	1	0	0	2.88	62.9	28.7	2.98	0.34	0.03	0.03	89.2	31	348	8.2	0.06	17.4	3.51	110	57	5.25	0.56	5.12	2.43	168.7	144	1.87	179.7	12.1	129.9	1.3	14.62	2.83	Endometrioid adenocarcinoma	IAG1	Endometrioid adenocarcinoma	I	表浅肌层
12	680427	56	16.8	32.66	463.85	66	1	54	4	4	1	1	10.5	78.2	13.9	8.22	0.7	0.09	0.05	91.5	32	349	8.2	0.16	17.3	4.25	136	192	7.46	1.25	3.32	1.29	200	138.8	2.36	556.9	54.8	9.24	5	4.46	2.39	Endometrial clear cell adenocarcinoma	IVB	Endometrial clear cell adenocarcinoma	II	子宫浆膜层
13	680812	49	36.6	39.43	265.05	66	0	0	5	1	1	1	4.62	50	38.9	2.31	0.34	0.11	0.06	83.4	28.2	338	8.4	0.19	17.7	4.07	115	220	8.83	0.91	4.19	1.43	237	142.4	2.23	12.5	14.8	13.54	1.5	2.81	2.51	Endometrioid adenocarcinoma	IB	Endometrial clear cell adenocarcinoma	II
14	678594	43	15.7	93.37	363.35	53	0	0	0	0	0	0	6.91	47.4	39.8	3.27	0.75	0.08	0.06	82.9	28	337	6.5	0.19	17.3	4.74	133	291	5.25	1.6	6.9	1.69	153	140.2	2.33	27.5	18.7	52.73		2.1	4.85	Endometrioid adenocarcinoma	IBG1	Endometrioid adenocarcinoma	II	浅1/2肌层
15	682049	56	13.1	50.94	266.3	60	1	51	2	2	0	0	4.86	40	47.9	1.94	0.41	0.1	0.07	91.4	30.2	331	7.2	0.16	16.6	4.21	127	222	5.27	1.63	6.59	0.97	153	138	2.24	17.7	7.3	40.36	5	3	1.85	Endometrioid adenocarcinoma	IAG2	Endometrioid adenocarcinoma	II	浅1/2肌层
16	682058	50	6.6	41.49	242.85	54	1	48	3	2	0	1	6.47	58.7	30.5	3.8	0.51	0.09	0.1	90	31.1	345	7.5	0.17	16.8	4.1	127	230	5.25	2.87	4.31	1.35	157	141	2.39	122.6	8.7	211.72		2.52	2.31	Endometrioid adenocarcinoma	IG2	Mixed endometrial adenocarcinoma	II	深1/2肌层
17	681432	55	6.8	39.6	275.4	58	1	49	6	6	1	1	5.05	63.7	27.6	3.21	0.32	0.08	0.03	91.1	31.5	345	8	0.18	18.1	4.53	142	223	4.58	1.31	4.11	1.07	156	143.8	2.27	7.9	5.5	5.65	0.8	3.1	2.07	Endometrioid adenocarcinoma	IAG3	Endometrioid adenocarcinoma	II	1/2肌层
18	682517	50	28.2	32.66	298.55	60	1	49	4	2	0	1	5.79	61.4	31.9	3.56	0.33	0.01	0.05	91.5	31	339	8.6	0.1	18.8	4.03	125	114	5.41	0.65	3.33	1.04										Endometrioid adenocarcinoma	IBG1	Endometrioid adenocarcinoma	II	浅1/2肌层
19	683090	46	17.2	39.43	431.35	54	0	0	3	1	0	1	6.41	59.5	32.9	3.82	0.33	0.1	0.06	88.5	30.4	343	6.3	0.18	15.9	4.29	130	286	4.95	1.74	6.05	1.96	190	139.8	2.3	9.3	6.1	5.31	1.3	3.71	1.05	Endometrioid adenocarcinoma	IAG1	Mixed endometrial adenocarcinoma	II
20	683050	67	12.4	56.3	369.95	62.5	1	51	3	1	0	0	7.45	45.5	47.4	3.39	0.39	0.08	0.06	87.8	29.8	339	7.2	0.19	16.6	4.28	127	270	5.61	0.94	6.99	1.75	261.4	143	2.4	104	38.1	32.39		3.77	<0.5	Endometrioid adenocarcinoma	IBG2	Endometrioid adenocarcinoma	II	浅1/2肌层
21	681581	51	26.1	29.4	421.75	54	0	0	2	2	0	0	7.21	60.8	34.5	4.38	0.25	0.04	0.06	88.2	30.2	342	6.9	0.19	16.8	4.68	141	272	4.15	0.79	6.27	2.61	194.2	144	2.38	29.5	8.7	129.62		3.89	2.12	Endometrioid adenocarcinoma	IAG2	Endometrioid adenocarcinoma	II	浅1/2肌层
22	683592	59	85	54.89	751.8	62	1	46	5	3	1	1	4.97	54.4	36.4	2.71	0.28	0.11	0.06	63.2	21	333	8.3	0.25	17.1	5.01	105	304	4.49	0.61	5.2	1.97	168.4	140	2.18	8.5	9	1	0.6	2.95	2.39	Endometrioid adenocarcinoma	IAG2	Endometrioid adenocarcinoma	II	浅1/2肌层
23	683645	49	10.3	55.86	280.7	64	1	48	3	3	0	1	4.45	61.8	28.8	4.45	0.56	0.06	0.06	87.8	30.3	345	8.9	0.16	17.2	3.91	120	197	4.94	0.89	6.64	1.61	184.2	142	2.38	9.6	6.2	45.14		2.63	0.93	Endometrioid adenocarcinoma	I	Endometrioid adenocarcinoma	II	浅1/2肌层
24	683845	51	314.7	76.5	333.5	57	0	0	5	3	0	0	5.05	68.1	23.4	3.44	0.34	0.06	0.04	86.7	29.9	345	16.5	0.23	22.2	4.05	121	139	6.23	2.45	4.88	1.47	175.7	141	2.22	177.7	11.1	482.79	1.4	1.72	3.54	Endometrioid adenocarcinoma	I	Endometrioid adenocarcinoma	II	浅1/2肌层
25	683937	58	41.4	17.2	388.35	65	1	56	6	3	0	1	6.81	56.1	33	3.82	0.71	0.01	0.03	85.4	29.3	343	7.3	0.19	16.8	4.06	119	258	4.31	2.85	6.36	1.67	198.7	145	2.23	56.5	8	238.03		3.44	1.91	Endometrioid adenocarcinoma	IIG1	Endometrioid adenocarcinoma	I	浅1/2肌层
26	683526	50	22.4	250.75	313.85	64	0	0	2	2	1	1	5.16	85.1	13	7.1	0.15	0	0.01	87.7	30.8	351	6.2	0.14	16.8	4.66	141	166	6.22	2.56	6.15	1.11	151	145	2.39	34.3	28.9	9.83	2.2	7.17	1.98	Endometrioid adenocarcinoma	IAG1	Endometrioid adenocarcinoma	II	浅1/2肌层
27	683442	50	37.9	46.24	388.35	60	1	49	1	1	0	1	4.27	41.4	43.5	1.77	0.37	0.23	0.04	87.2	30.2	346	6.5	0.13	16.6	3.92	118	204	5.73	0.61	4.6	1.49	179	137.5	2.51	21.5	40.5	25.13		4.24	1.63	Endometrioid adenocarcinoma	IA	Endometrioid adenocarcinoma	II	浅肌层
28	684611	49	31.9	31.93	337.95	50	0	0	1	1	0	0	6.77	31.5	64.3	2.13	0.23	0.05	0.01	67.3	21.1	313	7.5	0.2	16.4	3.48	73	260	4.8	1.54	3.1	0.97	152.1	139	2.1	29	7.7	33.45	1	5.05	1.87	Endometrioid adenocarcinoma	IAG1	Endometrioid adenocarcinoma	I	浅1/2肌层
29	684125	51	16.9	69.59	383.3	64	0	0	2	2	0	0	6.04	67.6	24.2	4.08	0.39	0.07	0.04	83.3	28.9	347	7.6	0.2	16.8	3.9	113	258	5.47	0.63	6.3	2.42	148.8	140	2.12	9.6	13.3	12.05		1.74	1.76	Endometrioid adenocarcinoma	IIAG1	Endometrioid adenocarcinoma	I	浅1/2肌层
30	684121	58	36.1	0.35	431.05	62	1	50	3	1	0	1	7.24	46.6	43.3	3.38	0.41	0.25	0.07	81.7	28.2	346	7.2	0.21	18.2	4.31	122	286	5.27	1.43	4.59	1.37	129	141.9	2.33	21.2	11.9	9.93	0.9	1.79	1.34	Endometrioid adenocarcinoma	IAG2	Endometrioid adenocarcinoma	II	浅1/2肌层
31	685729	58	113.9	307.72	304	62	1	47	4	3	0	0	4.97	56.3	34.9	2.1	0.3	0.01	0.02	86.7	30.7	354	6.8	0.14	17.3	4.11	119	316	4.95	2.29	5.27	1.4	181.3	141	2.22	23.9	21.6	33.48	1.4	3.09	3.43	Endometrial clear cell adenocarcinoma	IA	Endometrioid adenocarcinoma	II	浅1/2肌层
32	685237	59	28.4	77.6	402	59	1	40	1	1	0	0	5.52	54.1	32.2	2.99	0.34	0.4	0.02	85.6	29.1	340	8.8	0.19	18.4	4.52	132	209	4.53	1.16	4.96	1.59	158.6	143	2.33	16.3	21.3	71.09	1.1	2.85	3.35	Endometrioid adenocarcinoma	IAG3	Endometrioid adenocarcinoma	III	浅1/2肌层
33	686405	42	142.6	53.99	302	71	0	0	8	3	0	1	5.27	57.7	32.5	3.04	0.38	0.07	0.06	89.3	30.4	340	7.2	0.17	16.7	4.28	130	230	5.52	0.93	4.98	1.55	199.8	144	2.19	6.1	12.6	11.94	0.3	8.75	1.18	Endometrioid adenocarcinoma	IBG2	Endometrioid adenocarcinoma	II	深1/2肌层
34	686750	51	20.6	116.36	272.5	51	1	0	2	2	0	0	3	52.4	32.9	1.57	0.33	0.07	0.04	80.1	27.2	339	6.5	0.16	16.9	4.2	114	339	4.91	1.44	5.11	1.52	144.5	142	2.23	15.7	14.8	7.66	0.7	2.52	0.62	Endometrioid adenocarcinoma	IIG1	Endometrioid adenocarcinoma	II	浅1/2肌层
35	686511	56	14.3	88.85	257	50	1	53	3	3	0	0	3.58	50.6	41.2	2.12	0.27	0.03	0.05	93.2	32	343	7.1	0.17	16.6	3.23	105	258	5.37	0.53	4.76	1.54	148.4	137	2.01	63.3	17	42.1		3.65	2.03	Endometrioid adenocarcinoma	IA	Endometrioid adenocarcinoma	I
36	687670	48	11.5	29.7	970.5	54	0	46	2	2	0	0	5.47	57.7	35.5	3.16	0.3	0.03	0.05	89.9	30.3	338	6.8	0.14	16.1	4.15	126	207	4.42	0.88	5.06	1.26	175.9	145	2.05	25.1	8.1	35.79	0.9	3.11	2.55	Mixed endometrial adenocarcinoma	IAG3	Endometrioid adenocarcinoma	I	浅1/2肌层
37	R126475	50	15.8	47.58	332.5	70	1	49	4	2	0	1	9.62	71.9	21.6	6.91	0.5	0.07	0.06	86.2	29.6	343	7.7	0.22	17.3	4.67	138	288	5.55	2.04	5.69	1.7	226.9	142.5	2.19	36	19.2	55.77		3.68	4.13	Endometrioid adenocarcinoma	IIG2	Endometrioid adenocarcinoma	II	浅1/2肌层
38	687858	51	49.2	32.29	268.5	62	0	0	3	3	0	0	5.03	64.6	26.9	3.25	0.33	0.06	0.04	60.2	18.6	308	6.5	0.27	17.5	4.35	81	418	5.07	0.68	4.11	1.07	117.7	144	2.111	7	5.7	4.14	0.8	2.65	1.2	Endometrioid adenocarcinoma	IAG1	Endometrioid adenocarcinoma	I	浅1/2肌层
39	685375	56	66.8	274.18	972.5	50	1	50	2	2	0	0	7.48	64.2	29.8	4.8	0.33	0.08	0.03	93.5	31.4	336	10.8	0.27	12.1	4.49	141	245	5.8	1.19	4.86	1.24	176.6	144	2.31	15.6	7.8	4.29		2.13	1.97	Endometrioid adenocarcinoma	IAG1	Endometrioid adenocarcinoma	I	浅1/2肌层
40	685730	52	100.2	33.05	310.5	43	1	51	4	4	1	0	3.77	42.5	45.1	1.6	0.22	0.16	0.08	88.4	30.5	345	9	0.19	18.6	4.01	122	209	4.55	0.63	3.93	1.04	152.8	145	2.17	11.6	5.9	15.28		3.11	2.74	Endometrioid adenocarcinoma	IAG2	Endometrioid adenocarcinoma	II	浅1/2肌层
41	668119	63	63.2	54.22	282.5	70	1	0	1	1	1	1	6.3	63.5	27.6	4	1.74	0.23	0.05	80.6	27.9	346	7.7	0.2	18.8	4.7	131	262	6.42	0.85	4.84	1.51	182.3	142	2.31	10.1	14.7	5.18	0.4	3.49	1.25	Endometrioid adenocarcinoma	IAG2	Endometrioid adenocarcinoma	II	浅1/2肌层
42	688267	47	11.3	30.7	306	46	0	46	3	2	0	0	4.83	38.5	36.4	1.86	0.34	0.81	0.06	84.4	29.2	347	7.3	0.17	17	4.26	125	239	5.23	1.28	6.06	1.19	176.4	145	2.45	14.4	11.5	15.24		1.69	0.97	Mixed endometrial adenocarcinoma	IA	Mixed endometrial adenocarcinoma	I	浅1/2肌层
43	688383	51	23.1	48.78	382	81	0	0	2	2	0	0	7.16	55.7	36.2	3.99	0.49	0.06	0.03	74.7	24.6	329	8.5	0.21	17.8	3.56	88	253	5.97	1.63	4.92	1.13	178.5	145	1.98	58	10.7	51.83		2.65	1.41	Endometrioid adenocarcinoma	IA	Endometrioid adenocarcinoma	I	浅1/2肌层
44	566304	67	12.4	36.11	239	49.5	1	52	4	4	0	0	7.21	73.1	18.6	5.27	0.35	0.2	0.05	91.4	31.5	345	6.3	0.15	17.3	4.03	127	242	5.39	1.64	5.43	1.16	161.4	143	2.15	18	12.4	10.29	1.2	1.25	1.03	Endometrioid adenocarcinoma	IAG3	Endometrioid adenocarcinoma	II	浅1/2肌层
45	R127782	49	14.3	41.85	239	55	0	0	3	3	1	1	14.5	56.3	37	3.45	0.33	0.04	0.04	91.6	31.1	340	6.4	0.22	16	3.12	98	265	3.1	0.57	3.15		599	142	1.88	10.8						Endometrioid adenocarcinoma	IG1	Endometrioid adenocarcinoma	II	深1/2肌层
46	688116	53	16.2	59.21	270.5	56.5	1	50	2	2	1	0	7.17	58.6	35.5	4.2	0.3	0.08	0.04	81.4	27.9	343	6.2	0.19	16.3	3.98	111	302	5.56	1.31	4.72	1.23	146.3	139	2.03	75.1	8.9	483.28	1.7	1.26	5.9	Endometrioid adenocarcinoma	IBG2	Endometrioid adenocarcinoma	II	深1/2肌层
47	688458	69	14	124.38	848	56.5	1	0	4	4	0	0	9.72	59.24	29.84	5.75	0.44	0.61	0.02	77	25.5	331	11.4	34	14.2	4.99	127	295	4.38	1.4	4.78	1.17	155.9	142	2.17	18.9	5	<2	0.8	1.45	0.55	Endometrioid adenocarcinoma	IIG2	Endometrioid adenocarcinoma	II	浅1/2肌层
48	R128771	62	6.8	49.96	266.5	65	1	48	2	2	1	0	6.78	63.7	27.5	4.32	0.34	0.22	0.04	87.3	31.1	357	7.2	0.2	17	4.08	127	282	7.36	0.88	5.74	1.71	185.7	144	2.23	18.3	12.8	17.13		2.83	1.8	Endometrioid adenocarcinoma	IAG1	Endometrioid adenocarcinoma	I	浅1/2肌层
49	R128823	56	12.96	16	330	63	1	0	3	1	0	0	5.12	49.6	43.8	2.54	0.28	0.02	0.03	90.6	31.7	350	6.7	0.17	16.7	4.64	147	252	4.73	0.52	4.69	2.19	206.1	142	2.33	14.2	9.3	27.29	1.4	1.54	3.2	Endometrioid adenocarcinoma	IA	Endometrioid adenocarcinoma	II	浅1/2肌层
50	R129021	69	12.9	43.36	278.5	64	1	0	5	0	0	0	3.99	40.8	49.3	1.63	0.17	0.17	0.05	74.4	25.4	341	6.6	0.33	15.9	3.35	85	490	5.21	1.05	3.63	1.2	167.7	138	2.28	33.4	14.2	2.68	4	1.3	1.16	endometrial mesenchymal sarcoma	II	endometrial mesenchymal sarcoma	II	深1/2肌层
51	670623	59	10.2	76.79	276.5	48	1	48	3	3	0	0	5.07	66.7	26	3.38	0.31	0.04	0.03	88.7	31.6	356	11	0.2	19	3.95	125	194	4.28	0.71	5.2	1.5	185.9	142	2.22	6.6	6.4	14.15	0.9	1.95	2.08	Endometrioid adenocarcinoma	IAG1	Endometrioid adenocarcinoma	II	浅1/2肌层
52	671257	58	11	19.47	296	51	1	0	2	1	0	0	6.74	56.6	32.1	3.81	0.42	0.33	0.02	89	31.6	355	12.6	0.26	19.1	3.87	122	205	4.62	0.6	3.78	1.44	147.7	144	2.36	21.4	16.6	12.41	0.9	3.13	2.67	Endometrioid adenocarcinoma	IIG2	Endometrioid adenocarcinoma	I	浅1/2肌层
53	669923	61	6.2	33.16	279	71	1	0	2	2	0	1	4.06	43.6	40.4	2.77	0.48	0.48	0.06	77.2	26.6	344	8.2	0.21	16.8	3.9	103	251	5.45	1.39	4.33	1.3	166.1	142	2.13	42.1	6.4	16.17		2	1.08	endometrial mesenchymal sarcoma	IA	endometrial mesenchymal sarcoma	II
54	673839	53	21.6	127.15	379.5	85	1	53	3	1	1	0	6.76	59.8	32.8	4.04	0.39	0.08	0.03	85.3	29.6	347	10.9	0.26	13.7	3.77	123	269	6.88	2.39	5.9	1.31	153.7	144	2.1	51.3	39.1	1102.6	0.7	4.24	1.46	Endometrioid adenocarcinoma	IB	Endometrioid adenocarcinoma	II	浅1/2肌层
55	688062	64	11.5	23.7	233	52	1	0	4	1	0	0	3.31	63.7	29.1	2.11	0.22	0.02	0	71.1	24	337	9	0.17	18.2	4.35	104	187	4.62	0.79	4	1.51	124.5	143	2.1	16.3	7	6.58	0.8	3.49	1.97	Endometrioid adenocarcinoma	IA	Endometrioid adenocarcinoma	I	浅1/2肌层
56	674395	49	16.5	46.57	233	50	0	0	3	1	0	0	6.87	73.5	18	5.05	0.42	0.11	0.06	86.6	29.7	343	7.5	0.15	16.9	3.92	116	197	4.9	0.97	6.39	2.65	178.7	145	2.01	18.8	5.5	11.59	0.6	3.68	1.6	Endometrioid adenocarcinoma	IAG2-G3	Endometrioid adenocarcinoma	II-III	浅1/2肌层
57	683965	71	23.5	43.2	269	80	1	0	1	1	0	0	8.31	67	24.9	5.57	0.53	0.13	0.01	99.3	32.8	330	9.8	0.24	11.1	4	131	240	4.76	1.88	4.83	1.05	151.7	142	1.99	11.8	9.3	10.86	1.2	3.14	0.77	Endometrioid adenocarcinoma	IAG1	Mixed endometrial adenocarcinoma	II
58	690600	62	11	32.14	323	58	1	50	3	2	1	0	6.54	75.5	15.9	4.94	0.44	0.11	0.01	82.4	27.3	331	10	0.16	12.2	4.32	118	162	5.12	1.19	4.43	1.01	166.3	144	2.12	12	13.7	37.91		2.85	1.87	Endometrioid adenocarcinoma	IAG1	Endometrioid adenocarcinoma	II	浅1/2肌层
59	692224	47	9.5	282.6	239	58.5	0	0	1	0	0	0	5.24	64.9	22.7	3.4	0.49	0.11	0.06	74.6	23.9	320	8.8	0.25	17.3	3.93	94	282	5.2	1.35	4.02	1.17	134.9	141	2.05	9.8	22.7	4.23	0.4	2.94	1	Endometrioid adenocarcinoma	IB	Endometrioid adenocarcinoma	I	浅1/2肌层
60	R131771	69	65.6	72.5	272.5	65	1	0	2	2	0	0	5.75	40.4	51.2	2.32	0.3	0.19	0	91.7	31.7	345	6.8	0.18	16.5	4.22	134	266	6.05	1.61	4.29	1.25	128.5	143	2.23	7.1	12.3	6.46	3	4.61	1.22	Endometrioid adenocarcinoma	IbG2	Endometrioid adenocarcinoma	II	浅1/2肌层
61	R132630	54	11.3	40.99	237.5	58	1	0	2	2	1	0	4.28	58.5	31.8	2.5	0.28	0.13	0.01	85.3	28.8	338	7.6	0.2	16.1	3.38	97	263	5.31	0.49	3.78	1.54	221	142	2.16	88.1	14.2	4.68		3.01	1.35	Mixed endometrial adenocarcinoma	IA	Mixed endometrial adenocarcinoma
62	692539	66	21.4	83.35	278.5	60	1	55	7	7	1	1	4.39	51.7	41.6	2.27	0.19	0.1	0	92	31.1	339	8.5	0.18	16.7	3.93	122	215	5.46	1.16	4.62	1.35	144	145	1.99	17.4	7.7	18.52	2.6	5.6	1.4	Endometrioid adenocarcinoma	IAG1	Endometrioid adenocarcinoma	I	浅1/2肌层
63	692149	61	5.2	34.13	318	63	1	53	5	5	0	1	5.77	60.3	28.9	3.48	0.3	0.27	0.06	89	30.1	338	8.1	0.24	18.6	4.65	140	302	5.93	1.65	6.64	2.05	182.9	144	2.3	4.6	9.8	14.32	1.3	3.97	1.79	Endometrioid adenocarcinoma	IA	Endometrioid adenocarcinoma	I	浅1/2肌层
64	R135081	58	27.6	34.25	988.5	49	1	53	3	2	0	0	4.56	58.5	30.8	2.67	0.34	0.08	0.07	87.3	29.6	339	7.3	0.15	16.6	4.26	126	198	5.16	0.5	5.73	1.89	191.4	145	2.1	18.5	11.7	9.28		5.73	1.94	Endometrioid adenocarcinoma	IAG1	Endometrioid adenocarcinoma	I	浅1/2肌层
65	R135257	53	11.5	25.7	278.5	65	1	50	3	2	0	1	6.8	54.9	38.4	3.74	0.38	0.04	0.04	88.4	30	339	6.3	0.16	16.1	4.62	138	255	5.29	2.32	5.58	1.46	216.6	137	2.21	25.8	6.8	150.04		2.91	2.88	Endometrioid adenocarcinoma	IIG2	Endometrioid adenocarcinoma	II	深1/2肌层
66	R135814	54	107.5	56.9	278.5	51	1	50	3	1	0	0	7.26	62.3	28	4.52	0.52	0.15	0.04	90.5	30.5	337	6.9	0.16	15.2	3.12	95	227	5.1	0.63	5.34	1.87	156.9	144	2.17	6.4	6	6.86		3.69	0.56	Endometrioid adenocarcinoma	IBG2	Endometrioid adenocarcinoma	I	深1/2肌层
67	R152151	74	18.39	31.89	217	65	1	52	4	3	1	1	9.29	68.9	23.4	7.52	0.65	0.12	0.07	88	30.1	342	7.1	0.23	17.8	4.23	128	284	6.35	2.68	4.88	1.19	180.4	143	2.13	9.5	10.3	13.28	2.9	4.35	3.43	Endometrioid adenocarcinoma	IBG2	Endometrioid adenocarcinoma	II	浅1/2肌层
68	R144553	43	22.5	34.63	289	78.5	0	0	1	1	0	0	6.68	53.4	38.1	3.44	0.46	0.04	0.04	89.1	30.5	343	8	0.19	17.6	4.15	130	309	4.79	435	7.49	1.93	171.9	141	2.34	7.2	12.4	7.24	3.4	5.29	2.19	Endometrioid adenocarcinoma	IA	Endometrioid adenocarcinoma	II
69	R154110	54	15.9	55.81	714.5	62	1	0	2	2	0	0	5.71	57.9	35.1	3.31	0.3	0.06	0.04	87.3	30.4	348	8.7	0.22	17.6	4.58	139	257	5.4	3.98	5.21	1.34	142.3	142	2.34	46.1	7.8	42.98		3.23	3.17	Endometrioid adenocarcinoma	IAG1	Endometrioid adenocarcinoma	I	浅1/2肌层
70	R144282	64	9.6	33.25	322	66	1	0	4	4	1	0	3.97	64.2	26.3	2.55	0.28	0.07	0.03	65.4	20.8	318	8.5	0.25	16.6	3.94	82	290	7.14	0.91	4.3	1.31	120.1	142	2.26	67	4.7	35.98		2.46	0.79	Endometrioid adenocarcinoma	IIG2	Endometrioid adenocarcinoma	II	深1/2肌层
71	R148484	48	13.3	36.75	255	66	1	46	3	3	0	1	5.28	40.6	48.8	2.14	0.25	0.19	0.12	88.1	30.5	346	10.4	0.31	18.6	4.49	137	296	5.77	1.96	5.63	1.41	168.5	142	2.39	21.3	11.1	8.13	1	4.42	2.89	Endometrioid adenocarcinoma	IA	Endometrioid adenocarcinoma	I
72	R155984	55	19.4	41.85	298.5	60	1	0	3	1	0	0	6.25	51.3	39.3	3.21	0.46	0.09	0.04	73.4	23.7	323	7.2	0.26	17.5	4.92	117	354	4.93	1.51	5.36	1.61	181.4	140	2.3	9.8	8.9	5.39	0.9	2.92	1.83	Endometrioid adenocarcinoma	IAG2	Endometrioid adenocarcinoma	II	浅肌层
73	R153782	60	11.5	52.48	262.5	78	1	53	4	4	0	0	4.69	46.7	40.8	2.19	0.49	0.06	0.04	83.9	28.7	342	9.4	0.18	18.7	5.19	149	192	5.29	2.9	6.87	1.63	201.6	141	2.31	21.1	6.1	19.02		4.29	1.23	Endometrioid adenocarcinoma	IIG2	Endometrioid adenocarcinoma	II	深肌层
74	R156406	53	15.9	36.14	297.5	80	1	0	5	1	0	1	5.2	55.9	35.3	2.91	0.33	0.09	0.04	86.5	29.4	340	7.4	0.16	17.5	4.59	135	210	5.32	1.7	4.68	1.32	793.3	144	2.25	17.6	13.5	<2	3.2	2.42	3.58	Endometrioid adenocarcinoma	II	Endometrioid adenocarcinoma	I	浅1/2肌层
75	R152480	56	26.2	73.59	289	52	1	56	3	2	0	0	3.71	58.7	30.7	2.76	0.27	0.17	0.06	82.3	27.4	333	7.4	0.2	17.2	3.92	108	266	5.92	1.12	5.69	1.83	215.3	144	2.35	62.4	11	95.18	0.6	1.75	1.15	Endometrioid adenocarcinoma	IIG2	Endometrioid adenocarcinoma	I	浅1/2肌层
76	R144548	43	50.6	122.43	235	68	0	0	4	4	0	0	5.59	64.7	27.8	5.06	0.47	0.08	0.04	91.7	31.3	341	10.7	0.31	13	4.56	140	307	5.31	1.18	4.86	1.64	164.3	140	2.27	28.7	9.1	11.02	0.6	2.5	1.89	Endometrioid adenocarcinoma	IIG2	Endometrioid adenocarcinoma	I	浅1/2肌层
77	R149341	53	78.1	67.04	235	44	1	50	2	2	0	0	6.14	48.8	40.6	3	2.49	0.07	0.05	85.2	28.3	332	7.6	0.19	16.5	4.23	120	245	4.29	0.69	5.14		479	143	2.36	8	6.7	15.43	0.5	1.75	4.53	endometrial mesenchymal sarcoma	I	endometrial mesenchymal sarcoma	I
78	R150076	49	15.66	44.17	332	61	0	0	2	2	0	0	11	61.7	29.7	6.81	0.69	0.17	0.09	77.2	25.3	328	7.2	0.17	16.8	4.2	106	235	4.75	1	6.32	1.82	141.5	141	2.34	10.6	6.5	11.42	0.5	2.19	1.58	Endometrioid adenocarcinoma	II	endometrial mesenchymal sarcoma	II	浅1/2肌层
79	R154412	57	7.1	100.64	231	56	1	0	2	2	0	0	3.61	58.4	34.1	2.11	0.21	0.01	0.05	64.4	19.7	306	8.3	0.22	19.5	3.7	73	257	4.7	0.66	4.5	1.53	127	136	2.3	12.8	15.4	12.29	1.2	4.57	1.68	Endometrioid adenocarcinoma	IIG2	Endometrioid adenocarcinoma	II
80	R153553	55	9.9	66.63	255	55	1	0	7	1	0	1	6.9	65.2	29.2	4.5	0.28	0.07	0.04	83.5	28.5	342	6.7	0.15	17.5	5.08	145	220	6.84	1.73	4.8	1.2	153.9	142	2.41	24.2	10	10.19		4.76	0.83	Endometrioid adenocarcinoma	IA	Endometrioid adenocarcinoma	I	浅肌层
81	R160211	48	30.1	44.36	1229.5	65	0	0	3	2	0	1	3.95	56.6	31.4	2.24	0.39	0.05	0.04	79.8	26.6	334	7.5	0.18	16.5	3.8	101	234	4.15	0.6	3.32	1.37	265.3	139	2.05	10.7	6.2	8.72	1.4	1.25	1.16	Endometrioid adenocarcinoma	IBG1	Endometrioid adenocarcinoma	I	浅1/2肌层
82	R160013	72	28.9	119.35	535	63	1	52	4	2	0	1	4.92	51.9	37.3	2.55	0.38	0.1	0.06	85.4	29.4	345	7.7	0.17	17.6	4.09	120	223	4.91	1.69	5.29		396	137	2.21	7.3	7.4	14.57	1.4	3.19	1.11	Endometrioid adenocarcinoma	IAG1	Endometrioid adenocarcinoma	I	浅1/2肌层
83	R140712	52	44.5	31.89	800	64.5	1	48	3	3	1	0	6.79	54.1	36.6	3.68	0.46	0.12	0.06	86.9	29.3	338	9.1	0.25	18	4.36	128	270	4.13	2.08	5.86	1.38	225.5	143	2.28	26.3	10.5	30.66		4.13	2.31	Endometrioid adenocarcinoma	IAG1	Endometrioid adenocarcinoma	I	浅1/2肌层
84	R142624	47	28.5	34.63	657.6	64	0	0	4	3	0	0	7.2	64.5	27.7	4.64	0.44	0.08	0.04	85.9	29.2	340	7.4	0.21	16.5	4.36	127	282	5.11	1.47	4.99		310	145	2.3	19	17.9	9.62	0.8	2.55	0.95	Endometrioid adenocarcinoma	IAG1	Endometrioid adenocarcinoma	I	浅1/2肌层
85	R139618	49	10.4	55.81	535.95	62	1	48	5	4	0	1	4.89	58.3	26.1	2.85	0.47	0.24	0.05	85	29.3	345	6.7	0.19	16.2	4.57	134	288	6	1.59	6.21	1.71	267.3	141	2.28	223.3	30.7	516.14	0.9	3.35	3.1	Endometrioid adenocarcinoma	IIG2	Endometrioid adenocarcinoma	II	浆膜外
86	R139747	56	6.9	33.25	461.2	56	1	0	3	3	0	0	7.98	65.1	28.9	5.2	0.41	0.03	0.04	80.5	25	311	8.5	0.17	17.5	3.43	86	197	5.1	4.68	3.66		497	147	2.25	43.6	23.7	19.96		2.84	1.81	Endometrioid adenocarcinoma	IBG1	Endometrioid adenocarcinoma	I	浅1/2肌层
87	R145695	50	15.22	36.75	619.95	68	1	0	0	0	0	0	4.88	59.6	34.9	2.91	0.21	0.03	0.03	92	31.3	341	8.4	0.24	17.3	4.12	129	286	6.43	1.04	4.21	1.21	169	137	2.4	35.1	16.4	3.04	0.7	2.78	1.62	Endometrioid adenocarcinoma	IA	Endometrioid adenocarcinoma	I	浅1/2肌层
88	R161064	55	17.9	41.85	490.6	68	1	0	2	1	0	0	8.46	69.1	25.3	5.84	0.36	0.06	0.06	80.4	27.2	339	7.2	0.23	17.5	4.45	121	324	5.85	1.38	6.5	1.74	146.2	141	2.42	89.4	34.9	39.78	0.6	4.19	1.43	Endometrioid adenocarcinoma	IIG1	Endometrioid adenocarcinoma	I	浅1/2肌层
89	R163820	56	15.9	52.48	549.15	52	1	52	4	4	0	0	6.01	50.6	40.2	3.04	0.49	0.04	0.03	83.1	28.3	341	8.4	0.16	17.9	5.24	148	187	4.62	1	3.61		456	145	2.22	19.6	23	16.3	0.4	2.71	4.11	Endometrioid adenocarcinoma	IBG2	Endometrioid adenocarcinoma	II	浅1/2肌层
90	R162951	63	26.2	36.14	438.95	43	1	50	2	2	0	0	5.29	70.3	24.6	3.72	0.16	0.07	0.04	88.5	30.9	349	6.4	0.16	16.6	3.68	114	254	7.7	2.21	3.45		495	145	2.02	67.7	4.7	4.79	0.9	8.63	0.71	Endometrioid adenocarcinoma	IBG3	Endometrioid adenocarcinoma	III	深1/2肌层
91	R167232	35	50.6	73.59	484.75	69	0	0	2	1	0	1	5.99	42.4	47.1	2.54	0.49	0.08	0.06	86.7	29.8	344	7.1	0.21	16.2	4.22	126	299	5.6	1.73	6.14	1.49	353.3	139	2.5	32.4	5.8	12.72	1	3.27	1.1	Endometrioid adenocarcinoma	IIG1	Endometrioid adenocarcinoma	I	深肌层
92	R165835	57	78.1	122.43	467.15	52.5	1	51	2	2	0	0	3.64	73	19.5	2.66	0.2	0.06	0.01	82.7	27.9	337	7.3	0.2	16.5	2.84	79	277	10.15	0.5	3.68	1.58	169.7	141	2.05	36.3	6.7	9.65	0.3	1.9	1.94	Endometrioid adenocarcinoma	IA	Endometrioid adenocarcinoma	I	浅1/2肌层
93	R167236	54	15.66	67.04	457.45	60	1	0	1	1	1	0	11.4	79.1	15	9	0.54	0.08	0.05	81.3	26.7	328	6.1	0.25	16.5	4.09	111	455	6.45	1.38	5	1.4	149	141	2.4	29.7	9.5	12.36		3.65	1.16	Endometrioid adenocarcinoma	IIG2	Endometrioid adenocarcinoma	II	深1/2肌层
94	R166933	36	7.1	44.17	381.5	53	0	0	3	2	0	0	7.76	58.1	31.3	4.51	0.48	0.29	0.05	94.6	31.6	334	6.8	0.14	17	4.08	129	199	4.67	1.05	3.79		418	141	2.13	740.9	13.4	7279.26	5.7	5.55	2.91	Endometrioid adenocarcinoma	IBG1	Endometrioid adenocarcinoma	I	深1/2肌层
95	R168363	50	9.9	100.64	442.35	50	1	48	2	2	0	0	5.43	59.9	31.8	3.25	0.36	0.05	0.05	89.8	30.7	342	7.5	0.17	16.2	4.52	139	225	4.76	2.27	5.01	1.81	364	139	2.36	42	11.6	3.49	0.8	3.58	1.99	Endometrioid adenocarcinoma	IB	Endometrioid adenocarcinoma	II	深1/2肌层
96	R169798	65	20.1	66.63	449.65	65	1	53	4	3	0	0	6.83	59	32.8	4.03	0.39	0.15	0.02	90.9	30.6	337	9.7	0.22	10.6	4.08	125	227	4.8	1.38	4.5	1.49	177	140	2.3	32.2	8.3	48.98		2.11	1.18	Endometrioid adenocarcinoma	IIG1	Endometrioid adenocarcinoma	I	深1/2肌层
97	R170075	54	18.8	383.75	527.95	61	1	48	3	2	0	1	5.26	60.1	30.1	3.16	0.32	0.14	0.06	88.2	3	340	6.5	0.26	17.1	4.4	132	396	5	1.73	5.3	1.77	118	137	2.3	38.8	11.2	11.02	0.5	2.3	1.42	Endometrioid adenocarcinoma	IAG1	Endometrioid adenocarcinoma	I	表浅肌层
98	51226	56	13.3	33.66	434.3	56	1	52	5	3	0	0	7.29	67.4	25.5	4.91	0.33	0.12	0.07	85.6	29	339	6.6	0.3	16.3	4.57	131	393	4.1	0.72	4.5	1.37	197	141	2.3	17.6	26.9	29.42	0.6	2.21	1.7	Endometrioid adenocarcinoma	IA	Mixed endometrial adenocarcinoma	II	浅1/2肌层
99	11206554	52	19.4	51.1	419.76	43	1	49	5	3	0	1	4.94	43.9	46.9	2.17	0.34	0.08	0.03	86.2	29.4	341	6.7	0.19	17.6	3.93	116	281	4.4	1.74	5.7	1.2	175	139	2.3	24.8	21.5	76.55		2.91	1.64	Endometrioid adenocarcinoma	IB	Mixed endometrial adenocarcinoma	II	深1/2肌层
100	10142	49	11.5	35.81	397.43	65	1	47	2	2	0	0	7.6	64	26.6	4.86	0.56	0.1	0.06	85.4	28.7	336	7.8	0.22	16.8	4.88	140	288	5.5	1.73	4.9	1.57	179	141	2.5	42.5	8.2	34.77	1.2	3.11	4.29	Endometrioid adenocarcinoma	II	Endometrioid adenocarcinoma	II	深肌层
