# Supplementary material for: Combination of serum CST1 and HE4 for early diagnosis of endometrial cancer
Source: PeerJ. 2023 Dec 5;11:e16424. doi: 10.7717/peerj.16424 (PMC10704982; doi:10.7717/peerj.16424)
Supplement: Supplemental Information 5 [file peerj-11-16424-s005.xls]

## Sheet: Sheet1
Number	Hospital number	Age	CA125(IU/ml)	HE4(pmol/l)	CST1(μg/L)	Height(m)	Weight(kg)	Menopausal	Menopausal age	Gestation	Number of births	Diabetes	hypertention	WBC	NE(%)	lym(%)	NE Count	MONO Count	EON Count	BASO Count	MCV	MCH	MCHC	MPV	PCT	PDW	RDW-CV	RDW-SD	RBC	Hb	PLT	Glucose	Triglyceride	Triglyceride	HDL	LDL	LDH	NA	Ca	CA125	CA153	CA199	SCC	AFP	CEA	Clinical diagnosis	FIGO installments	Pathological diagnosis	pathological grade
1	299458	60	5.71	97.4	770.5	1.67	64	1	53	2	2	0	0	6.04	67.6	24.2	4.08	0.39	0.07	0.04	83.3	28.9	347	7.6	0.2	16.8	12.1	37.9	3.9	113	258	5.47	0.63	6.3	2.42	2.37	148.8	140	2.12	9.6	13.3	12.05	0.6	1.74	1.76	Endometrioid adenocarcinoma	IIIAG1	Endometrioid adenocarcinoma	III
2	301394	58	34.13	122.6	1845.2	1.65	64.4	1	50	4	2	0	0	6.99	74.6	20.8	2.77	0.14	0.01	0.02	95.9	31.7	331	10.8	0.27	12.8	13.5	47.3	3.64	113	243	5.29	0.96	5.61	1.45	3.31	161.2	141	2.26	64.7	10.9	98.3	0.4	4.33	2.43	Endometrioid adenocarcinoma	IIIC1	Endometrioid adenocarcinoma	III
3	298431	43	19.6	105.52	1355.4	1.61	64	0	0	5	0	0	0	3.99	40.8	49.3	1.63	0.17	0.17	0.05	74.4	25.4	341	6.6	0.33	15.9	13.5	41.3	3.35	85	490	5.21	1.05	3.63	1.2	3.47	167.7	138	2.28	33.4	14.2	2.68	4	1.3	1.16	Endometrial mesenchymal sarcoma	IIIA	Endometrial mesenchymal sarcoma	III
4	301423	59	9.95	46.02	462.6	1.6	66.5	1	56	2	2	0	0	5.32	54.3	31.9	2.89	0.43	0.23	0.09	88.9	30.5	343	7.7	0.17	17.2	12.4	39.7	4.51	137	225	4.2	0.9	6.1	1.96	3.19	143	144	2.3	16.7	40.3	11.52	1	4.62	2.06	Endometrioid adenocarcinoma	IIIC1	Endometrioid adenocarcinoma	II
5	296406	60	64	134.82	611.4	1.62	61.5	1	51	3	1	0	0	3.59	60.1	30.4	2.16	0.2	0.11	0.03	77.6	25.4	327	8.6	0.19	18.1	11.9	44.1	4.02	102	226	4.7	1.54	3.7	1.09	2.87	232	143	2.3	65.6	18.3	29.12	1	2.43	1.09	Endometrioid adenocarcinoma	IIIC1	Endometrioid adenocarcinoma	III
6	296170	57	28.9	49.72	390.3	1.59	76	1	54	3	2	0	0	3.77	41	41.2	1.55	0.42	0.22	0.04	92.7	31.3	338	8.3	0.15	16.8	10.8	45.6	4.32	135	185	4.36	0.89	3.3	1.31	2.84	472	141	2.29	17.4	14.3	<2	0.7	2.94	2.02	Mixed adenocarcinoma of the endometrium	IIIA	Mixed adenocarcinoma of the endometrium
7	301490	66	15.63	45.55	1046.1	1.61	61	1	55	6	4	0	1	7.03	50.6	40.4	2.79	0.4	0.07	0.03	91.2	30.3	333	10.9	0.26	13	12.9	43.3	4.57	134	253	5.4	0.66	4.53	1.53	2.66	174.9	142	2.51	29.7	13.5	9.27	0.8	1.94	1.37	Endometrioid adenocarcinoma	IIIA	Endometrioid adenocarcinoma	III
8	302397	56	21.68	47.7	996.7	1.49	48	1	55	7	5	0	0	6.1	56.5	32.7	3.58	0.52	0.13	0.03	91.1	29.8	327	9.5	0.18	9.4	12.9	43	3.76	115	274	4.64	2.9	3.32	1.27	2.46		140	2.27	39.2	27.8	3.35		4.67	2.13	Endometrioid adenocarcinoma	IIIA	Endometrioid adenocarcinoma	III
9	302428	53	8.98	42.39	747.3	1.57	55.1	1	49	4	4	1	0	6.1	54	36.9	3.29	0.49	0.05	0.02	69	20.2	293	9.5	0.25	9.7	17.7	44.3	3.71	75	268	5.88	3.51	3.27	1.35	3.01	331	142	2.15	19.1	8.6	40.57	0.7	1.27	2.34	Endometrioid adenocarcinoma	IIIA	Endometrioid adenocarcinoma	III
10	299264	56	32.58	35.62	646	1.55	55	1	48	2	2	0	0	7.36	62.1	26.1	4.57	0.59	0.24	0.04	82.1	26.8	327	10.1	0.29	11.2	16.3	49.1	4.29	115	283	4.28	1.09	4.7	1.29	1.98	371	137	2.24	11.7	7.9	227.14	1.4	2.7	2.07	Endometrioid adenocarcinoma	IIIAG1	Endometrioid adenocarcinoma	II
11	302412	54	19.92	77.37	800	1.54	64.8	1	46	2	2	1	1	6.92	61.9	31.2	4.28	0.33	0.11	0.01	78.5	26.8	341	10.7	0.26	12.5	13.2	37.7	4.7	126	246	14.39	3.41	5.29	1.27	2.55	234.8	137	2.25	121.5	11.2	<2	0.4	3.22	8.11	Endometrioid adenocarcinoma	IIIAG1	Endometrioid adenocarcinoma	III
12	299458	60	5.71	97.4	280.1	1.56	85	1	54	4	2	0	0	7.75	63.1	30.2	4.89	0.41	0.08	0.03	91.9	29.4	320	10.2	0.33	11.3	13.3	44.8	4.05	119	321	5.7	1.65	4.93	1.16	3.02	273	140	2.22	166.7	7.5	57.55		2.06	2.24	Endometrioid adenocarcinoma	IIIAG1	Endometrioid adenocarcinoma	II
13	302376	58	290.5	47.51	298.9	1.54	68	1	45	7	6	0	0	4.54	50.4	41	2.29	0.29	0.07	0.03	83.8	26.8	319	9.5	0.2	9.7	12.7	39	4	107	210	4.24	1.2	6.11	1.21	4.49	167	144	2.17	17	5.6	43.32	1.3	2.22	2.03	Endometrioid adenocarcinoma	IIIAG1	Endometrioid adenocarcinoma	III
14	300274	73	13.75	124.85	2632.3	1.5	56.5	1	52	4	4	0	0	9.72	59.24	29.84	5.75	0.44	0.61	0.02	77	25.5	331	11.4	34	14.2	15.2	38.1	4.99	127	295	4.38	1.4	4.78	1.17	3.15	155.9	142	2.17	18.9	5	<2	0.8	1.45	0.55	Endometrioid adenocarcinoma	IIIAG2	Endometrioid adenocarcinoma	II
15	300066	51	158	41.6	1795	1.65	67	0	0	2	1	1	1	6.15	59.8	32.1	3.68	0.33	0.14	0.03	90.5	29.7	328	8.5	0.23	18.7	13.3	39.5	4.51	134	270	11.41	0.97	2.84	1.25	1.52	114.4	144	2.35	25.4	5	19.87	1	4.41	1.79	Endometrioid adenocarcinoma	IIIAG2	Endometrioid adenocarcinoma	II
16	302538	51	11.18	39.5	921	1.49	52.7	1	48	6	2	0	1	4.53	57.8	27.8	2.62	0.46	0.13	0.04	90	30.4	338	9.7	0.17	10.1	13.2	43.4	4.11	125	174	4.93	0.7	3.57	1.23	1.78	201	141	2.11	11.6	12.4	19.37	1.8	2.19	5.54	Endometrioid adenocarcinoma	IIIB	Endometrioid adenocarcinoma	III
17	302492	57	23.45	44.5	217	1.5	56	1	50	0	0	0	0	4.85	62.5	30.5	3.03	0.29	0.04	0	85.9	37.3	434	8.8	0.26	8.7	12	35.2	3.27	122	300	5.88	1.08	4.95	1.19	1.99	569	142	2.37	58.8	10.3	26.29	0.9	1.84	1.35	Plasma papillary adenocarcinoma of the uterus	IIIB	Endometrial clear cell adenocarcinoma	III
18	295050	51	90	60.9	2888	1.6	63.3	1	50	2	2	0	0	7.05	63.5	28.5	5.7	0.59	0.1	0.03	89.4	30.7	344	9.5	0.26	10.4	11.9	38.3	4.02	126	295	5.7	1.32	5.84	0.97	4.53	208.4	139	2.24		20.5	<2	0.9	1.67	1.35	Plasma papillary adenocarcinoma of the uterus	IIIC1	Plasma papillary adenocarcinoma of the uterus	III
19	299053	53	37.76	93.6	262.5		65	1	51	2	2	0	0	7.6	64	26.6	4.86	0.56	0.1	0.06	85.4	28.7	336	7.8	0.22	16.8	14.2	39.6	4.88	140	288	5.5	1.73	4.9	1.57		179	141	2.5	42.5	8.2	34.77	1.2	3.11	4.29	Endometrial clear cell adenocarcinoma	IIIA	Endometrial clear cell adenocarcinoma	II
20	301586	63	8.96	28.4	258	1.55	74	1	50	3	1	0	0	5.16	41.2	46.9	2.13	0.39	0.18	0.04	88.3	29.3	332	10.7	0.19	19.3	15.1	40.3	4.49	131	179	5.14	0.86	4.68	1.81	2.15	170.9	144	2.2	17.9	15	<2	1.2	1.78	9.43	Mixed adenocarcinoma of the endometrium		Mixed adenocarcinoma of the endometrium	III
21	231425	45	1251	132.9	409.5	1.57	58.6	0	0	2	2	0	0	5.59	51.5	37.4	2.88	0.51	0.1	0	82.7	25.1	304	9.1	0.2	9.3	19.7	58.8	3.82	96	222	5.12	0.62	4.2	1.25	2.28	181.7	144	2.23	209.4	22.1	233.03	1.6	3.16	2.83	Endometrioid adenocarcinoma	IIIC1	Endometrioid adenocarcinoma	I
22	297875	53	13.17	36.1	300.5	1.5	50.3	1	51	2	2	0	0	3.82	56	34.8	2.14	0.26	0.09	0	82.2	30.7	374	10	0.15	11.3	12.6	38	4.43	136	155	5.01	1.25	3.92	0.97	2.1	128.2	143	2.16	50.5	7	68.84	2.3	1.43	1.21	Mixed adenocarcinoma of the endometrium	IIIC1	Mixed adenocarcinoma of the endometrium	III
23	301252	49	58.2	29.8	324	1.61	56.3	0	0	1	1	0	0	8.59	92.7	2.7	7.96	0.32	0.06	0.02	63.6	19	299	7.9	0.16	12.7	17.2	37.3	4.07	124	214	7.9	0.97	5.26	1.27	1.79	101	144	2.26	115.1	22.5	2.21	1.4	1.2	2.4	Mixed adenocarcinoma of the endometrium	IIIC1	Mixed adenocarcinoma of the endometrium	III
24	295726	54	40	58.9	254.5	0.67	68	0	0	2	1	0	0	8.46	69.1	25.3	5.84	0.36	0.06	0.06	80.4	27.2	339	7.2	0.23	17.5	15.9	39.7	4.45	121	324	5.85	1.38	6.5	1.74		146.2	141	2.42	89.4	34.9	39.78	0.6	4.19	1.43	Mixed adenocarcinoma of the endometrium	IIIC1-G1	Mixed adenocarcinoma of the endometrium	I
25	302852	58	14.32	56.9	305	1.59	62	1	48	5	4	0	1	4.89	58.3	26.1	2.85	0.47	0.24	0.05	85	29.3	345	6.7	0.19	16.2	14.7	39.8	4.57	134	288	6	1.59	6.21	1.71		267.3	141	2.28	223.3	30.7	516.14	0.9	3.35	3.1	Endometrioid adenocarcinoma	IIIC1 G2	Mixed adenocarcinoma of the endometrium	III
26	303376	58	18.62	49.9	309	1.52	54	1	52	2	2	1	0	7.59	75.8	17.7	5.76	0.41	0.06	0.02	87.4	29.3	336	10.5	0.3	12.7	12	38.6	4.94	144	269	5.59	2.16	5.37	1.2	3.44	121	140	2.18	77.9	7.6	19.4	0.6	4.09	0.96	Endometrioid adenocarcinoma	IIIC1 G2	Endometrioid adenocarcinoma	II
27	300939	61	99.3	30.68	425	1.59	70	1	46	5	5	0	1	5.28	60	28.2	3.17	0.4	0.18	0.04	84.1	28.3	336	9.9	0.32	11.2	13.3	41.4	4.28	121	326	4.95	1.17	3.21	1.06	1.84	138	144	2.21	19.1	16.9	15.56	0.7	4.75	2.2	Endometrioid adenocarcinoma	IIIC1 G2	Endometrioid adenocarcinoma	II
28	2001	59	11.1	50.52	425	1.53	49.1	1	49	1	1	0	0	9.3	71	16.1	6.6	0.94	0.09	0.02	87.4	26.5	303	12.7	0.29	19.4	23	57.1	4.23	119	272	5.18	0.71	5.78			429	140	2.43	20.8	5	3.55	2.3	1.03	0.61	Endometrioid adenocarcinoma	IIIC1 G3	Endometrioid adenocarcinoma	III
29	2002	57	40.7	1248.6	272.5	1.52	55.8	1	51	8	5	0	1	5.84	56.4	32.7	2.24	0.34	0.06	0.02	98.1	36.2	369	11.6	0.2	13.8	11.3	40.6	4.46	159	149	5.3	1.8	7.36	1.51	4.14	225.8	139	2.15	11.2	8.9	7.51	8.4	3.27	6.38	Squamous endometrial cancer (non-keratinizing type)	IIIC2	Squamous endometrial cancer (non-keratinizing type)	III
30	2003	44	772	284.31	330	1.65	60.9	0	0	3	3	0	1	6.6	70.4	24.5	4.65	0.25	0.06	0.01	84.5	28.2	334	9.5	0.19	10.6	12.7	39	3.93	111	202	5.77	0.93	4.71	1.18	2.85	206.1	143	2.23	14.2	21.4	14.33	1	4.21	1.12	High-grade neuroendocrine carcinoma of the endometriumHigh-grade neuroendocrine carcinoma of the endometrium	IIIB	High-grade neuroendocrine carcinoma of the endometrium	III
31	2004	60	13.3	30.02	251	1.55	47	1	51	0	0	0	0	6.85	66.3	26	4.54	0.46	0.04	0.03	71.2	20.8	292	9.1	0.34	9.1	17	43.6	3.75	78	377	4.81	0.77	4.15	1.43	1.99	161.5	139	2.12	1328.7	220.4	71.97		3.3	0.82	Endometrioid adenocarcinoma	IIIC2	Endometrioid adenocarcinoma	II
32	2005	61	314.7	76.5	321.4	1.42	43.5	1	49	1	1	0	0	7.31	68.6	23.3	5.01	0.44	0.12	0.03	83	27.8	335	8.4	0.24	8.2	13.2	40.2	3.92	108	316	5.09	0.92	5.02	1.44		1186	143	2.25	54.3	13.7	4.47	1.4	2.33	1.74	Endometrioid adenocarcinoma	IIIA	Endometrioid adenocarcinoma	III
33	2006	58	113.9	307.72	292.5	1.55	62.2	1	57	4	4	1	1	6.54	54.1	37.8	3.54	0.39	0.1	0.04	82.3	28.1	342	12.5	0.17	16.4	12.6	37.8	4.69	132	133	6.43	1.23	4.1	1.28	2.49	140	142	2.26	14.3	14.6	18.92	0.6	2.56	1.07	Endometrioid adenocarcinoma	IIIA	Endometrioid adenocarcinoma	III
34	2007	67	120.2	209.23	990.1	1.65	60	0	0	1	1	1	0	11.4	79.1	15	9	0.54	0.08	0.05	81.3	26.7	328	6.1	0.25	16.5	13.1		4.09	111	455	6.45	1.38	5	1.4		149	141	2.4	29.7	9.5	12.36		3.65	1.16	Endometrioid adenocarcinoma	IIIA G1	Endometrioid adenocarcinoma	II
35	2008	57	17	334.24	268.3	1.51	71	1	52	2	2	0	1	8.44	51.9	39.9	4.38	0.45	0.19	0.03	80.7	27.6	342	8.9	0.2	9.8	13.1	38.6	4.67	129	227	11.25	2.08	5.69	1.24		402	143	2.21	95.5	9.9	860.22	0.6	3.39	4.44	Endometrioid adenocarcinoma	IIIC2 G2	Endometrioid adenocarcinoma	II
36	2009	54	9.7	24.84	1013.7	1.64	81	0	0	1	0	1	1	5.87	68.8	21.8	4.04	0.36	0.11	0.08	73.9	20.6	278	10.1	0.39	12.9	30.7	76.2	3.94	81	389	6.6	2.59	2.53	1.03	1.52	231.7	140	2.18	29	9.5	18.98	0.4	1.9	<0.50	Endometrioid adenocarcinoma	IIIB	Endometrioid adenocarcinoma	III
37	2010	56	45.9	67.35	296.1	1.57	56.5	1	50	1	1	1	0	6.86	75.4	15.9	5.17	0.55	0.03	0.02	89.9	29.8	331	12.1	0.2	14.7	12.8	42.2	4.84	144	169	9.01	1.4	5.01	1.96		550	140	2.37	38.5	18.5	25.24	4.2	1.91	1.75	Endometrioid adenocarcinoma	IIIC2 G3	Endometrioid adenocarcinoma	III
38	2011	55	5.71	97.4	980.7	1.45	52	1	53	2	2	0	0	6.21	54.5	33	3.38	0.53	0.2	0.05	90.4	30	332	9.4	0.25	9.9	13.2	43.7	4.36	131	270	6.05	2.28	6.33	1.35	3.95	179.5	138	2.34	11.3	7.6	36.92	1.3	2.23	1.21	Endometrioid adenocarcinoma	IIIC	Endometrioid adenocarcinoma	III
39	2012	61	34.13	122.6	342.6	1.58	46	1	43	2	2	0	0	4.18	68.5	19.1	2.86	0.4	0.11	0.01	88.7	29.9	337	10.2	0.32	11.5	12.3	39.4	3.45	103	313	4.65	>5.93	2.83	1.59		464	139	1.92	159.3	9.8	208.61	3.7	0.9	1.64	Endometrioid adenocarcinoma	IIIB	Endometrioid adenocarcinoma	II
40	2013	48	12.9	153.8	278.7	1.55	52	0	0	3	2	0	0	3.71	58.7	30.7	2.76	0.27	0.17	0.06	82.3	27.4	333	7.4	0.2	17.2	9.7		3.92	108	266	5.92	1.12	5.69	1.83		215.3	144	2.35	62.4	11	95.18	0.6	1.75	1.15	Endometrioid adenocarcinoma	IIIC G2	Endometrioid adenocarcinoma	II
41	2014	62	9.95	69.4	982.9	1.63	71.5	1	52	2	2	1	0	5.93	66.6	22.7	3.97	0.42	0.2	0.02	85	29.1	342	9.6	0.29	10.1	13.3	39.5	4.55	133	253	7.4	1.79	6.388	1.58	5	191.9	141	2.34	25.7	11.8	125.76	5.7	1.97	1.41	Adenosquamous carcinoma of the endometrium	IIIB	Adenosquamous carcinoma of the endometrium	III
42	2015	50	64	75.1	285.6	1.58	55	1	48	4	4	1	1	5.55	59.1	31.3	3.78	0.52	0.08	0.01	87.2	28.8	331	9.1	0.3	9.2	12.5	40	4.08	120	343	4.28	1.41	3.82	1.01	2.88	363	142	2.26	37.7	10.9	23.63		2.28	0.76	Endometrioid adenocarcinoma	IIIB	Endometrioid adenocarcinoma	II
43	2016	50	21.8	29.7	308.75	1.6	65	0	0	3	1	0	0	8.15	63.7	30.1	6.1	0.51	0.05	0.04	72.9	23.3	319	8.7	0.43	8.8	15.9	41.3	3.99	93	392	5.54	1.34	3.62	0.92	2.11	193.2	140	1.99	488.5	11.9	8872.97	1	1.66	2.34	Endometrioid adenocarcinoma	IIIC G2	Endometrioid adenocarcinoma	II
44	2017	53	15.63	45.1	441.55		70	0	0	2	2	0	0	5.84	62.3	28		0.36	0.14	0.07	85.9	28.7	334	5.8	0.28	15.9	12.9		4.1	118	479	5.13	1.2	4.82	1.28		183.2	142	2.1	24.1	22.2	16.65		2.43	2.57	Endometrioid adenocarcinoma	IIIC G3	Endometrioid adenocarcinoma	III
45	2018	51	21.68	47.7	419		59	1	50	3	3	0	1	7.14	66.9	23.7	4.78	0.54	0.1	0.04	84	28.5	340	6.4	0.23	16.4	12.1		4.14	118	364	5.71	1.84	5.46	1.49		1692	144	2.21	127.3	24.2	89.61	1.3	1.56	1.87	Endometrioid adenocarcinoma	IIIC G3	Endometrioid adenocarcinoma	III
46	2019	54	8.98	38.5	310.4	1.58	63	1	52	2	2	0	0	7.95	70.9	19.9	5.64	0.56	0.11	0.03	88.9	29.6	332	8.7	0.32	8.7	11	41.1	4.16	123	373	4.87	1.47	4.8	1.15	2.86	213.3	141	2.22	1366.3	57.9	48.11	2.8	1.94	1.42	Mixed adenocarcinoma of the endometrium	III	Mixed adenocarcinoma of the endometrium	III
47	2020	63	32.58	27.5	334.3	1.58	80.8	1	53	3	3	0	0	6.42	46.6	45.6	2.99	0.3	0.11	0.06	81.5	28	343	8.9	0.27	9.3	13	38.9	4.11	115	307	4.48	4.87	3.67	0.99	1.48	201.5	139	2.29	208	13	4.98	4.6	2.59	1.59	Mixed adenocarcinoma of the endometrium	III	Mixed adenocarcinoma of the endometrium	III
48	2021	45	19.92	69.5	264.8	1.53	50	0	0	1	1	1	0	6.07	61.8	30.5	3.75	0.39	0.06	0.02	86.6	30.5	353	10.5	0.34	12.2	13.5	41.9	4.55	139	329	6.11	0.44	4.16	1.42	2.17	214.9	140	2.34	9.7	15.8	12.45	1	1.71	1.67	Endometrial clear cell adenocarcinoma	III	Endometrial clear cell adenocarcinoma	III
49	2022	53	5.71	97.4	315.2	1.57	73.3	0	0	3	2	0	1	8.11	56.4	31.9	4.68	0.76	0.17	0.05	86.9	30.1	346	10.4	0.37	12.2	12.2	38.8	4.16	128	377	5.71	1.99	3.71	1.08	3.56	173.9	141	1.99	9.1	11.4	6.81	1	3.84	0.53	Mixed adenocarcinoma of the endometrium	III	Mixed adenocarcinoma of the endometrium	III
50	2023	49	290.5	37.9	319.9	1.55	58	0	0	2	1	0	0	7.87	68.5	21.6	5.39	0.57	0.15	0.06	86.3	29	337	10.3	0.42	12.3	13.2	41.1	4.51	131	406	5.19	1.55	4.98	1.45	3.23	227.4	143	2.35	29.3	8.7	13.35	0.9	2.01	1.08	Endometrioid adenocarcinoma	III	Endometrioid adenocarcinoma	III
51	2024	53	13.75	126.7	435.7	1.5	55	1	51	3	2	0	0	4.28	41.1	41.6	1.76	0.52	0.2	0.02	88.9	29.6	333	10.3	0.23	11.4	12.6	41.1	3.88	115	225	8.5	0.93	3.48	0.84	1.91	157.3	135	1.99	34.6	24.3	45.86	1	2.98	1.6	Mixed adenocarcinoma of the endometrium	III	Mixed adenocarcinoma of the endometrium	III
52	2025	57	158	41.6	290.3		80	1	55	5	1	0	1	5.2	55.9	35.3	2.91	0.33	0.09	0.04	86.5	29.4	340	7.4	0.16	17.5	10.7	40.1	4.59	135	210	5.32	1.7	4.68	1.32		793.3	144	2.25	17.6	13.5	<2	3.2	2.42	3.58	Endometrioid adenocarcinoma	III	Endometrioid adenocarcinoma	II
53	2026	56	11.18	39.5	383.35	1.61	60	1	51	3	3	0	0	12.28	92.4	6.3	11.35	0.08	0.01	0.03	93.8	31.4	335	12	0.3	16	11.7	40.5	4.36	137	248	5.08	0.84	4.89	1.63	2.44	168.4	141	2.26	16.9		65.9		2.08		Endometrioid adenocarcinoma	III	Endometrioid adenocarcinoma	II
54	2027	61	23.45	65.9	290.05	1.65	61	1	50	2	2	0	0	7.11	68.1	22.5	4.85	0.51	0.09	0.04	80.4	26.1	324	10.9	0.31	11.9	14.4	41.9	4.03	105	284	4.18	0.72	4.04	1.56	2.89	349	136	2.18	7.5	15.9		0.7		4.96	Endometrial clear cell adenocarcinoma	III	Endometrial clear cell adenocarcinoma	III
55	2028	53	90	98.6	483.85	1.58	65	1	50	4	3	0	1	6.81	56.1	33	3.82	0.71	0.01	0.03	85.4	29.3	343	7.3	0.19	16.8	12.7	38.1	4.06	119	258	4.31	2.85	6.36	1.67	1.48	198.7	145	2.23	56.5	8	238.03		3.44	1.91	Endometrioid adenocarcinoma	II G1	Endometrioid adenocarcinoma	I
56	2029	49	37.76	23.4	461.65	1.62	51	0	0	2	2	0	0	3	52.4	32.9	1.57	0.33	0.07	0.04	80.1	27.2	339	6.5	0.16	16.9	13.9	39.9	4.2	114	339	4.91	1.44	5.11	1.52	2.94	144.5	142	2.23	15.7	14.8	7.66	0.7	2.52	0.62	Endometrioid adenocarcinoma	IIIA G1	Endometrioid adenocarcinoma	II
57	2030	53	8.96	30.9	427.45		69	1	51	2	1	0	1	5.99	42.4	47.1	2.54	0.49	0.08	0.06	86.7	29.8	344	7.1	0.21	16.2	11.6	38.9	4.22	126	299	5.6	1.73	6.14	1.49	3.56	353.3	139	2.5	32.4	5.8	12.72	1	3.27	1.1	Endometrioid adenocarcinoma	IIIA G2	Endometrioid adenocarcinoma	II
58	2031	51	1251	132.9	738.4		65	1	50	4	3	0	0	6.83	59	32.8	4.03	0.39	0.15	0.02	90.9	30.6	337	9.7	0.22	10.6	12.6	45.1	4.08	125	227	4.8	1.38	4.5	1.49	3.29	177	140	2.3	32.2	8.3	48.98		2.11	1.18	Endometrioid adenocarcinoma	IIIA G2	Endometrioid adenocarcinoma	II
59	2032	60	13.17	36.1	390.4		53	1	50	2	1	0	1	5.57	68.5	23.9	3.82	0.33	0.08	0.02	83.2	28.8	346	6.8	0.18	16.3	15.6	41.1	4.64	134	267	5.43	2.91	5.48	1.41	1.99	179.5	144	2.53	98.4	34.1	7.64	0.7	2.61	5.06	Endometrioid adenocarcinoma	IIIB	Endometrioid adenocarcinoma	II
60	2033	59	58.2	29.8	437.65		60	1	50	3	1	0	1	7.42	62.6	27.7	4.82	0.42	0.26	0.07	87.9	30.7	350	6.2	0.15	16.4	11.9	36.9	4.64	139	252	5.66	2.11	4.99	1.25	3.56	151.6	143	2.15	18.8	10.1	75.16	0.6	2.6	3.55	Endometrial clear cell adenocarcinoma	IIIB	Endometrial clear cell adenocarcinoma	III
61	2034	63	40	58.9	458.4	1.53	53.6	1	49	2	2	0	0	8.94	64.1	28.5	5.73	0.56	0.06	0.02	89.1	31.3	352	10.6	0.28	12.4	12.5	39.8	3.86	121	264	4.94	1.79	5.18	1.22	3.25	150.6	142	2.29	23.4	7.5	13.53	1.3	2.1	1.55	Endometrioid adenocarcinoma	III G1	Endometrioid adenocarcinoma	III
62	2035	55	14.32	56.4	430.75	1.68	55	1	50	2	2	0	1	4.28	65.9	23.1	2.82	0.38	0.06	0.03	91.7	29.6	323	8.9	0.26	8.9	13.2	44.5	3.85	114	295	4.6	1.15	6.55	1.89	4.01	176	143	2.25	17.2	7.3	8.5		1.54	1.45	Endometrioid adenocarcinoma	IIIB	Endometrioid adenocarcinoma	I
63	2036	49	18.62	49.9	294.95	1.58	71	0	0	2	2	1	1	6.53	63.3	28.1	4.14	0.3	0.2	0.06	72.6	23.7	326	8.3	0.24	19.6	12		5.34	127	288	8.65	1.67	4.65	1.67		440	140	2.33	15.5	18.5	30.74	0.8	1.37	3.77	Endometrioid adenocarcinoma	IIIA G2	Endometrioid adenocarcinoma	III
64	2037	57	80.3	89.21	350.85	1.62	60	1	52	2	2	0	1	5.73	46.5	42.9	2.66	0.38	0.18	0.04	96.4	32.4	336	11.5	0.3	13.7	11.7	41.1	3.3	107	256	4.78	1.46	5.51	0.91	3.61	136.8	142	2.26	20.4	9.2	12.01	0.6	1.37	0.91	Endometrioid adenocarcinoma	IIIB	Endometrioid adenocarcinoma	III
65	2038	59	32.81	41.95	312.55	1.45	58	1	51	2	1	0	1	5.71	40.3	45.5	2.3	0.51	0.21	0.04	95.1	32.9	346	10.4	0.27	11.8	11.9	41.6	3.86	127	259	4.42	1.69	5.64	1.42	2.9	152.3	139	2.43	18.9	15.7	21.35	0.5	3.07	1.93	Endometrioid adenocarcinoma	IIIC	Endometrioid adenocarcinoma	III
66	2039	70	59.2	37.44	425.25	1.64	56	1	50	5	2	0	0	4.28	56.1	27.6	2.4	0.6	0.03	0.07	69.4	20.3	293	9.8	0.42	10.6	17.8	43.7	4.08	83	432	4.95	1.25	4.78	1.16	3.06	136.3	137	2.27	13.6	9.7	8.06		1.91	1.36	Endometrioid adenocarcinoma	IIIB	Endometrioid adenocarcinoma	I
67	2040	53	38.49	119.35	428.45	1.62	59.5	0	0	2	2	0	1	7.85	49.7	40.5	3.9	0.59	0.13	0.05	94.6	32.6	344	10.3	0.21	11.9	12.5	43	3.87	126	203	5.08	1.46	5.43	1.22	3.76	196	139	2.13	30.3	8.8	9.62	0.6	6.41	1.4	Endometrioid adenocarcinoma	IIIC	Endometrioid adenocarcinoma	III
[truncated: 13 more columns]
