# Supplementary material for: Combination of serum CST1 and HE4 for early diagnosis of endometrial cancer
Source: PeerJ. 2023 Dec 5;11:e16424. doi: 10.7717/peerj.16424 (PMC10704982; doi:10.7717/peerj.16424)
Supplement: Supplemental Information 6 [file peerj-11-16424-s006.xls]

## Sheet: Sheet1
Number	Hospital number	Disease diagnosis	Age	CA125(IU/ml)	HE4(pmol/l)	CST1(μg/L)
1001	686279	hysteromyoma	55	16.6	42.7	284.85
1002	686451	hysteromyoma	52	53.4	44.2	469.3
1003	686413	hysteromyoma	54	20.1	15.69	362.45
1004	686400	hysteromyoma	48	29	28.64	527.55
1005	686503	hysteromyoma	50	36.1	48.43	270.15
1006	454268	hysteromyoma	43	35.1	49.66	431.9
1007	683514	hysteromyoma	43	10.2	45	350.9
1008	674925	Endometrial thickening	50	9.8	51.61	144.4
1009	553409	Endometrial thickening	53	47.4	64.45	422.35
1010	686607	hysteromyoma	43	21.9	16.8	431.65
1011	518328	hysteromyoma	53	21.7	13.5	417.9
1012	686329	hysteromyoma	41	52.1	18.21	203.35
1013	686464	hysteromyoma	47	77.2	35.23	587.95
1014	686411	hysteromyoma	50	41.4	20.13	444.3
1015	532983	hysteromyoma	53	36.7	17.9	277.4
1016	685481	hysteromyoma	52	60.2	22.6	237.3
1017	686495	hysteromyoma	51	52.6	40.5	380.95
1018	686621	hysteromyoma	54	55.9	38	289.1
1019	686654	Endometrial thickening	48	16.9	42.5	297.6
1020	686772	hysteromyoma	59	37.3	55.3	288.9
1021	686735	hysteromyoma	46	14.3	39.6	284.1
1022	686331	hysteromyoma	41	69.8	36.32	307.65
1023	686256	hysteromyoma	48	17.6	42.1	304.75
1024	686326	hysteromyoma	46	9.8	36.87	417.4
1025	686416	hysteromyoma	46	48.3	62.9	344.95
1026	332621	hysteromyoma	40	37.7	57.87	256.85
1027	686714	hysteromyoma	53	11.5	47.56	326
1028	R162921	hysteromyoma	52	91.8	44.1	155.5
1029	R163410	hysteromyoma	55	7.9	39.25	231
1030	R161244	hysteromyoma	49	20.4	28.92	291
1031	R162963	hysteromyoma	58	28.8	43.38	224.5
1032	R163233	hysteromyoma	42	7.16	31.97	228.5
1033	R162430	hysteromyoma	43	14.6	29.58	300
1034	R162017	hysteromyoma	44	14.9	52.75	330
1035	R162149	hysteromyoma	49	16.3	39.52	286.5
1036	R163335	hysteromyoma	47	9.85	39.71	286.5
1037	R162499	hysteromyoma	39	65.75	34.13	250.5
1038	R162900	hysteromyoma	51	37.46	44.29	279
1039	R161927	hysteromyoma	57	22.32	28.3	284.5
1040	R162928	hysteromyoma	41	14.6	48.38	233
1041	R163822	hysteromyoma	43	11.3	26.81	244.5
1042	R163306	hysteromyoma	50	16.7	17.99	221
1043	R162940	hysteromyoma	48	20.1	39.19	361
1044	R163064	hysteromyoma	56	21.7	54.08	266.5
1045	R163698	Endometrial thickening	42	16.1	39.13	276.5
1046	R163414	hysteromyoma	44	17.2	41.61	243
1047	R161073	hysteromyoma	43	19.1	49.95	221
1048	R164269	hysteromyoma	45	17.5	46.31	213
1049	R164808	hysteromyoma	52	17.6	32.05	215
1050	R164826	hysteromyoma	44	12.87	59.39	231
1051	R164981	hysteromyoma	50	29.2	40.86	227
1052	R165028	hysteromyoma	42	10.5	26.23	225
1053	R165061	hysteromyoma	44	20.6	12.4	273
1054	R165341	hysteromyoma	54	11.8	23.39	405.5
1055	R166536	hysteromyoma	46	9.1	53.27	221
1056	R166723	hysteromyoma	40	21.9	48.43	235
1057	R165614	hysteromyoma	45	16.2	49.75	413.5
1058	R165158	hysteromyoma	51	30.7	35.82	189.5
1059	R164974	hysteromyoma	45	10.9	44.09	304
1060	R166143	Endometrial thickening	47	13.3	60.18	326
1061	R166064	hysteromyoma	51	14.5	30.95	247
1062	R165684	hysteromyoma	48	1.05	32.2	282.5
1063	R165506	hysteromyoma	46	42.8	35.46	220.5
1064	R166202	hysteromyoma	49	17.4	42.79	239
1065	R156755	hysteromyoma	40	33.6	36.21	233
1066	R165633	hysteromyoma	47	14.85	47.54	484.5
1067	R165371	hysteromyoma	50	91.99	25.19	248.5
1068	R164834	hysteromyoma	40	9.24	33.49	591.5
1069	R169949	hysteromyoma	50	20.77	43.67	213
1070	R169458	Endometrial thickening	51	14.52	68.02	357.5
1071	R168752	hysteromyoma	48	22.01	37.14	205
1072	R168920	hysteromyoma	41	22.8	41.61	211.5
1073	00010123	hysteromyoma	46	8.2	29.21	241
1074	00010149	hysteromyoma	49	45.6	41.11	437
1075	00010165	hysteromyoma	54	14	23.42	245
1076	00050510	hysteromyoma	51	24.64	39.58	199
1077	00010017	hysteromyoma	50	37.04	28.36	163.5
1078	00010357	hysteromyoma	55	14.17	56.75	233
1079	00010571	hysteromyoma	49	23.87	50.65	225
1080	00050436	hysteromyoma	60	23.4	36.07	284.5
1081	R167110	hysteromyoma	45	15.3	26.34	215
1082	R167036	hysteromyoma	40	20.9	80.9	326
1083	R167702	hysteromyoma	47	12.3	42.72	213
1084	R166390	hysteromyoma	45	8.8	25.88	233
1085	R167268	hysteromyoma	45	11.5	74.03	455
1086	R168713	Endometrial thickening	39	13.3	36.83	304
1087	R169175	Endometrial thickening	46	59.81	53.16	233
1088	R168428	hysteromyoma	53	13.29	48.98	207
1089	R169951	hysteromyoma	54	25.6	31.07	278
1090	R169516	hysteromyoma	51	46.23	65.97	369.5
1091	R169039	hysteromyoma	53	22.2	28.94	338
1092	R168349	hysteromyoma	47	29.26	101.6	231
1093	R168434	hysteromyoma	49	10.54	50.96	268
1094	R170136	hysteromyoma	42	14	33.56	214
1095	R168390	hysteromyoma	42	11.13	37.2	214
1096	R169537	hysteromyoma	49	9.2	30.68	311
1097	R168179	hysteromyoma	52	11.8	30.64	210
1098	R169241	hysteromyoma	42	44.7	33.83	234
1099	R169081	hysteromyoma	52	29.1	37.86	294.5
1100	R168954	hysteromyoma	40	27.3	30.47	317.69
