# Supplementary material for: Combination of serum CST1 and HE4 for early diagnosis of endometrial cancer
Source: PeerJ. 2023 Dec 5;11:e16424. doi: 10.7717/peerj.16424 (PMC10704982; doi:10.7717/peerj.16424)
Supplement: Supplemental Information 7 [file peerj-11-16424-s007.xls]

## Sheet: Sheet1
Number	Hospital number	Age	CA125(IU/ml)	HE4(pmol/l)	CST1(米g/L)
1	11836718	45	7.4	50.67	347.5
2	11913358	70	26.9	53.3	377.2
3	11391388	61	19.2	19.22	325.65
4	11916169	49	26.5	57.37	365.1
5	11916292	67	14.3	50.36	389.4
6	11771953	60	7.1	54.47	310.8
7	11916299	43	8.7	36.08	451.2
8	11915572	40	7.1	15.43	337.8
9	11551811	57	8.4	23.06	267.65
10	11916890	58	14.2	18.39	228
11	11890921	50	27.4	23.58	269.8
12	11836955	40	17.7	35.1	271.15
13	11890922	52	11.8	20.79	289.9
14	11835730	51	15.4	32.66	343.05
15	11835879	53	13.9	33.72	414.8
16	11771903	73	13	22.81	359.15
17	11920872	40	14.5	35.1	309.95
18	11835867	45	8.5	29.49	385.6
19	11920153	45	9.3	39.71	213.2
20	11868132	50	13.9	29.44	359
21	11920965	54	11.3	35.85	339.11
22	11919367	51	20.6	33.52	405.4
23	11772118	57	14.5	21.8	428.95
24	11520765	47	15.4	33.77	295.7
25	11538818	41	9.5	49.58	280.3
26	11921006	59	7.3	34.7	482.8
27	11916290	60	8.9	54.15	414.35
28	11921909	79	17.8	51.48	357.16
29	11921790	63	29.7	45.97	270.9
30	11520767	46	12.5	23.08	447.75
31	11837393	36	6.3	33.7	229
32	11921779	42	11.8	50.9	203
33	11788538	53	6	33.1	203
34	11837912	68	7.8	36.6	213
35	11921908	50	11.7	48.5	247
36	11921832	44	7.3	38.7	221
37	11922029	59	74.4	38.9	371.5
38	11922030	46	7.1	30.1	213
39	11922031	51	11.9	35.7	209
40	11922032	55	8.1	37.4	192
41	11922033	52	8.3	31.4	177
42	11922034	56	24.7	35.6	165
43	11922035	48	8.9	45	229
44	11922036	42	6.8	38.9	238
45	11922037	60	7.9	27.1	363.5
46	11922038	49	6.1	77.9	283
47	11922039	56	7.8	35.1	189
48	11922040	45	9.7	46	217
49	11922041	42	14.3	29.2	288.5
50	11922042	48	16.3	43.1	189.5
51	11922043	54	7.8	34.6	282.5
52	11922044	55	14.7	36.9	192
53	11922045	53	6.9	35.9	280
54	11922046	52	8.9	50.3	244.5
55	11922047	57	20.9	35.9	314
56	11922048	58	7.2	39.4	232.5
57	11922049	53	19.8	37.2	214
58	11922050	43	6	63.5	229
59	11922051	49	6.7	27	252.5
60	11922052	46	8.3	32.7	280.5
61	11922053	48	9.9	36.8	211.5
62	11922054	54	27.2	31.6	348
63	11922055	57	16.7	31.4	258
64	11922056	38	6.5	39.5	292.5
65	11922057	46	5.7	38.4	191
66	11922058	42	16.5	42.3	189
67	11922059	59	11.5	40.2	201.5
68	11922060	49	9.2	19.6	210
69	11922061	54	13.2	41.62	312
70	11922062	53	28.8	43.29	245
71	11922063	55	9	30.02	288.5
72	11922064	58	9.3	33.05	252.5
73	11922065	63	9.8	29.84	287.5
74	11922066	67	9.2	15.57	243
75	11922067	52	17.4	60.19	189
76	11922068	43	26.9	53.3	189
77	11922069	49	36.6	23.67	286
78	11922070	50	9.3	31.24	185
79	11922071	51	15.4	35.19	209
80	11922072	66	9.5	49.58	229
81	11922073	44	10.8	45.97	229
82	11922074	47	12.6	35.05	260.5
83	11922075	49	16.2	21.03	838
84	11922076	52	13.2	32.91	256.5
85	11922077	57	16.8	21.99	320
86	11922078	59	12.3	49.16	268.5
87	11922079	45	15.4	32.66	266.5
88	11922080	41	16.1	30.98	286
89	11922081	39	14.8	52.72	269
90	11922082	67	25.5	29.7	369.5
91	11922083	46	21.4	29.66	223
92	11922084	58	16.6	32.85	223
93	11922085	55	20.4	36.88	259
94	11922086	53	22.1	29.49	313
95	11922087	39	28.5	33.01	229
96	11922088	48	10.8	19.5	294
97	11922089	56	27.5	40.3	392
98	11922090	58	8.5	32.46	292
99	11922091	55	7.6	33.1	262.5
100	11922092	58	14.3	56.36	247
