# Supplementary material for: Combination of serum CST1 and HE4 for early diagnosis of endometrial cancer
Source: PeerJ. 2023 Dec 5;11:e16424. doi: 10.7717/peerj.16424 (PMC10704982; doi:10.7717/peerj.16424)
Supplement: Supplemental Information 8 [file peerj-11-16424-s008.xlsx]

## Sheet: Select zemr_patient_case_base@z
Number	Hospital number	Age	TEL	Discharge Diagnosis
1	00678785001	59	13509317382	Malignant tumor of the endometrium(II期（G2）)
2	00678496001	56	13559033883	Malignant tumor of the endometrium(T1aN0M0，IA期G2)
3	00676213001	59	15659843682	Malignant tumor of the endometriumG1T1N0M0IA期)
4	00679217002	62	18659197566	Malignant tumor of the endometrium子宫内膜混合性癌，子宫内膜样腺癌60%，透明细胞癌40%)
5	00668428002	85	15280422082	Malignant tumor of the endometrium(子宫内膜混合性癌IA期G3级，T1aN0M0)
6	00653668002	52	18059131736	Malignant tumor of the endometrium(子宫内膜去分化癌（ⅢC1期）)
7	00680427001	56	13859333299	Malignant tumor of the endometrium子宫内膜透明细胞癌)
8	00661357002	53	13960786633	Malignant tumor of the endometrium(子宫内膜样癌IA期(FIGO2009手术病理分期))
9	00680812001	49	15980529789	Malignant tumor of the endometrium(子宫内膜样癌II级术后)
10	00652692002	68	13799928212	Malignant tumor of the endometrium(子宫内膜样癌I级，Ia期)
11	00679236002	57	18060764367	Malignant tumor of the endometrium(子宫内膜样腺癌（G3）Ⅱ期)
12	00674131001	56	18060706081	Malignant tumor of the endometrium(子宫内膜样腺癌ⅠA期(Ⅰ级)T1aN0M0)
13	00680427002	56	13960966196	Malignant tumor of the endometrium(子宫内膜样腺癌ⅠA期)
14	00676936001	46	13506934556	Malignant tumor of the endometrium(子宫内膜样腺癌G2Ia期（FIGO2018），pT1N0M0期)
15	00679148002	67	18059033156	Malignant tumor of the endometrium(子宫内膜样腺癌IA1期（G1）)
16	00646355002	54	18120892431	Malignant tumor of the endometrium(子宫内膜样腺癌IA1期)
17	00662499002	67	13906912984	Malignant tumor of the endometrium(子宫内膜样腺癌IA期（G2）)
18	00679004001	66	13605057166	Malignant tumor of the endometrium(子宫内膜样腺癌Ia期)
19	00679004001	65	15160149088	Malignant tumor of the endometrium(子宫内膜样腺癌Ia期，FIGO分期2014年，T1aN0M0)
20	00655084002	55	13774578719	Malignant tumor of the endometrium(子宫内膜样腺癌IA期G1)
21	00667355001	51	13655033193	Malignant tumor of the endometrium(子宫内膜样腺癌IA期G1)
22	00668241002	67	15960176430	Malignant tumor of the endometrium(子宫内膜样腺癌伴鳞状分化IA期G1)
23	00614234001	58	13809560873	Malignant tumor of the endometrium(Ia期，G1（FIGO2009）)
24	00671680001	45	18806055962	Malignant tumor of the endometrium(IA期，T1aN0M0)
25	00634708002	66	13328260069	Malignant tumor of the endometrium(IB期（G1）)
26	00673343001	52	15159415536	Malignant tumor of the endometrium(T1a1N0M0期G1)
27	00682517002	50	18750134110	Malignant tumor of the endometrium(子宫内膜腺癌II期)
28	00662298002	64	18850422258	Malignant tumor of the endometrium(子宫内膜癌肉瘤Ⅲa期，FIGO2018手术-病理分期)
29	00641304001	58	18250474146	Malignant tumor of the endometrium(子宫高级别浆液性癌IIIA期)
30	00637036001	63	13055274939	Malignant tumor of the endometrium(混合性癌（透明细胞癌+子宫内膜样腺癌）)
31	00642364002	58	13348237660	Malignant tumor of the endometrium(子宫癌肉瘤ⅢC1期（手术病理分期FIGO2014)
32	00646195001	76	13625080987	Malignant tumor of the endometrium(子宫内膜中肾样癌IIIAFIGO2009)
33	00649054001	56	13906929356	Malignant tumor of the endometrium(混合性癌IIIC2（透明细胞腺癌+子宫内膜样腺癌）)
34	00683090002	46	13960958477	Malignant tumor of the endometrium(子宫内膜癌肉瘤ⅢC1期，FIGO2009年手术病理分期)
35	00681581001	51	15880311688	Malignant tumor of the endometrium(子宫内膜癌肉瘤ⅢC2期(T1bN2M0))
36	00683592002	59	18705915472	Malignant tumor of the endometrium(子宫内膜样腺癌G3ⅢA期)
37	00683050001	67	18359977925	Malignant tumor of the endometrium(子宫内膜样腺癌ⅢB期G2)

## Sheet: SQL Statement
select distinct c.residence_no, c.SICK_NAME, c.AGE, c.ADMISSION_TIME, (select t.present_addr_tel from zemr_patient_case_base@zemr t where a.patient_id = t.patient_id and a.event_no = t.event_no) tel, (select t.fee from zemr_patient_case_fee@zemr t where t.fee_code = '080100' and a.patient_id = t.patient_id and a.event_no = t.event_no), (select t.icd_code from zemr_patient_case_diag@zemr t where t…
